# Supplementary material
Source: Springer Nature journal article supplement (https://www.springermedizin.de/resource/supplementary/13075_2010_9706_MOESM3_ESM.pdf/9693326)

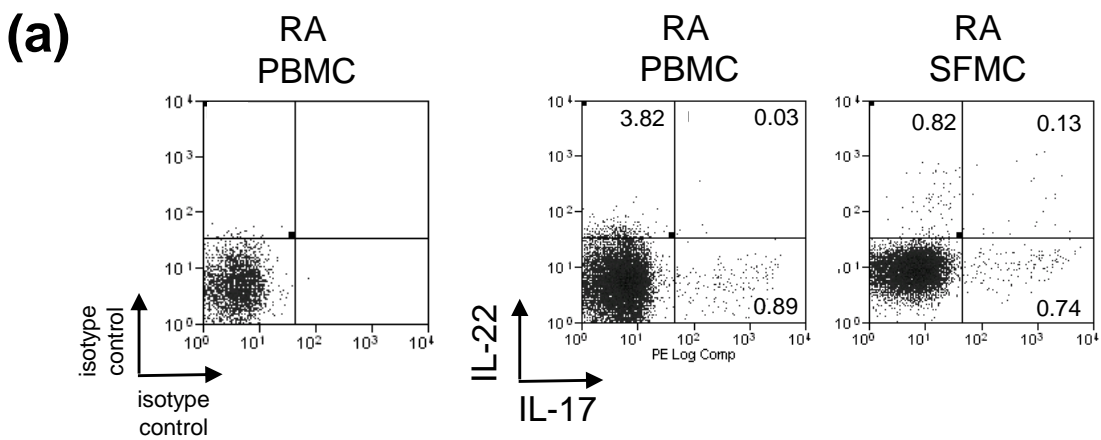

**(b)** **(c)**

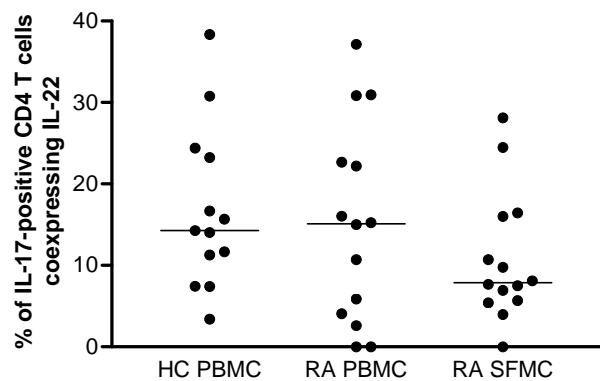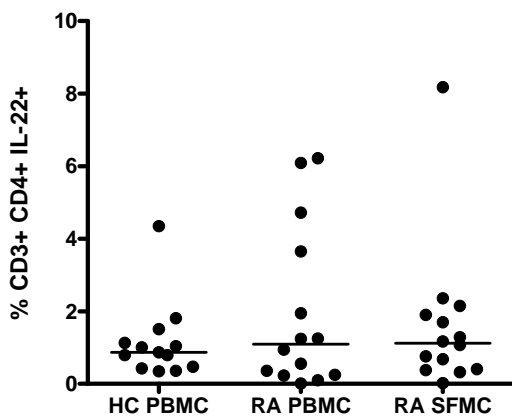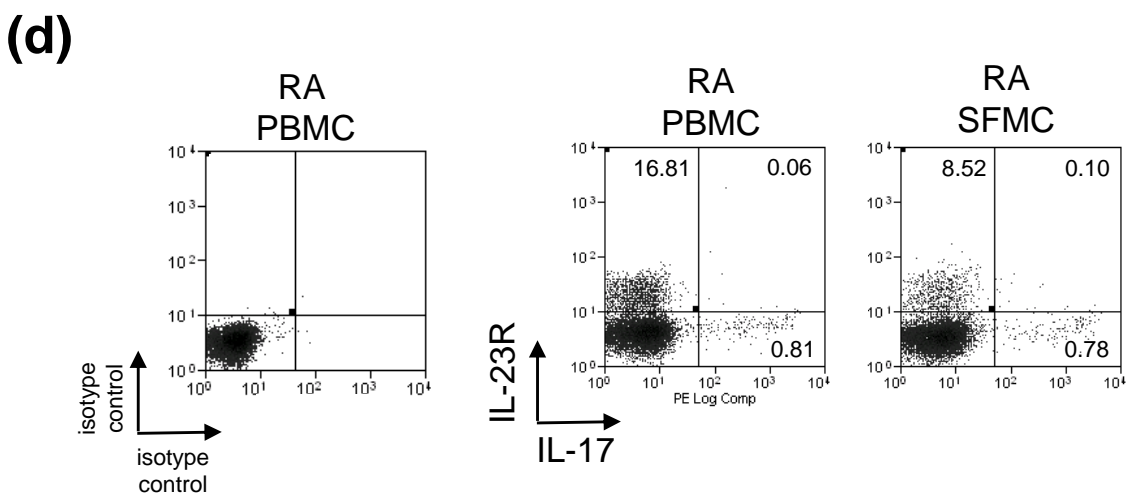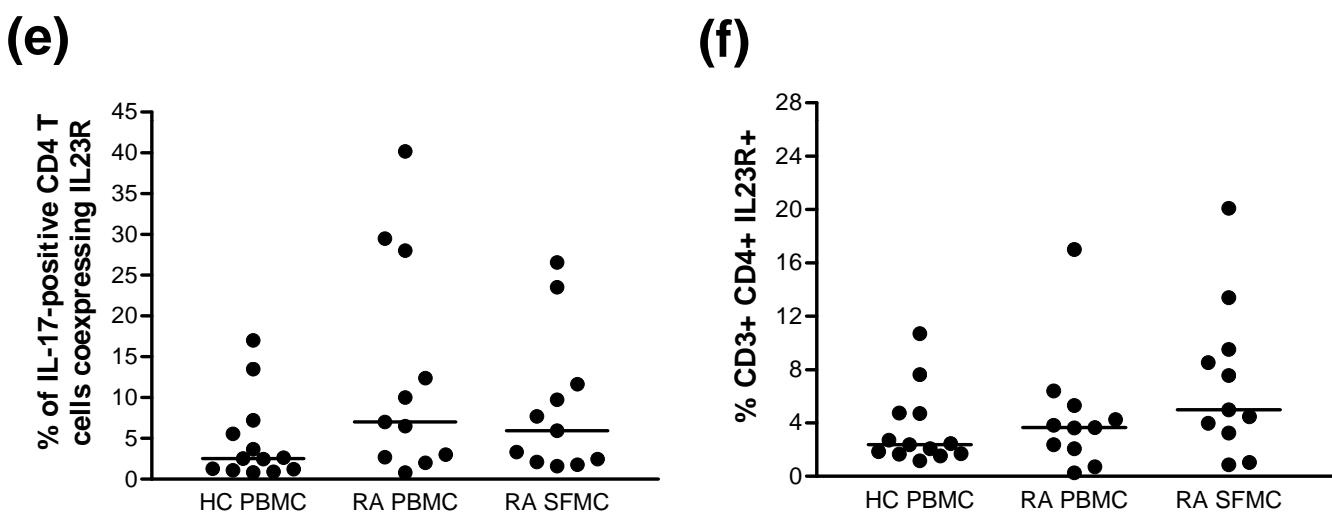

Supplement: MOESM3 [file 9693326]
